# Supplementary material
Source: JCI journal article supplement (doi:10.1172/jci175623)
Supplement: sd1 [file 1]

## Supplemental Data

**Supplemental Table 1:** List of antibodies used for Western blot studies.

| Antibodies     | Sources <sup>a</sup> | Catalog # |
|----------------|----------------------|-----------|
| T-HSL          | Cell Signaling       | 4107      |
| p-HSL (Ser660) | Cell Signaling       | 4126      |
| Akt            | Cell Signaling       | 2920      |
| p-Akt (Ser473) | Cell Signaling       | 9271      |

<sup>a</sup>Cell Signaling Technology, Leiden, The Netherlands, <https://www.cellsignal.com/>.

**Supplemental Table 2:** List of qPCR primer pair sequences and GeneBank accession numbers specific to each gene.

| Gene symbol                    | Forward primer (5'-3')   | Reverse primer (5'-3')    | GeneBank  |
|--------------------------------|--------------------------|---------------------------|-----------|
| <i>Acaca</i> ( <i>Acc1</i> )   | GTTGAGACGCTGGTTTGTA      | GGTCCTTATTATTGTCCCAGACGTA | NM_133360 |
| <i>Acs11</i> ( <i>Acs1</i> )   | TCTGCCACAGTGCTGACGTTTC   | TGTCCGTAGCCTTCATAGAACTGG  | NM_007981 |
| <i>Adgre1</i> ( <i>F4/80</i> ) | TGACAACCAGACGGCTTGTG     | GCAGGCGAGGAAAAGATAGTGT    | NM_010130 |
| <i>Col1a1</i>                  | TGCTTTCTGCCCCGGAAG       | GGGATGCCATCTCGTCCA        | NM_007742 |
| <i>Elovl6</i>                  | TCTGATGAACAAGCGAGCCA     | TGGTCATCAGAATGTACAGCATGT  | NM_130450 |
| <i>Fat</i> ( <i>Cd36</i> )     | GCGACATGATTAATGGCACAGACG | TCCGAACACAGCGTAGATAGACC   | NM_007643 |
| <i>Fabp1</i>                   | ACCCAAAGTGGTCCGCAATGAG   | TTCCAGCTTGACGACTGCCTTGAC  | NM_017399 |
| <i>Fasn</i>                    | CGGCTGCGTGGCTATGATTATG   | GCAGCTTGCTTGTTACCTTC      | NM_007988 |
| <i>Fatp1</i> / <i>Slc27a1</i>  | ATTGCCAACATGGACGGCAAGGTC | ACATGCGTGAGGATACGGCTGTTG  | NM_011977 |
| <i>Mcp1</i> / <i>Ccl2</i>      | GCAGTTAACGCCCCACTCA      | CCCAGCCTACTCATTGGGATCA    | NM_011333 |
| <i>P2ry1</i>                   | CGTGCTGGTGTGGCTCATT      | CGAGTCCCAGTGCCAGAGTAG     | NM_008772 |
| <i>P2ry12</i>                  | TGTGGGCGTACCCTACAGAAAC   | AGTGGAACCTGCAGACTGGCATC   | NM_027571 |
| <i>P2ry13</i>                  | TCAAAATCCTTTCCGACTCACA   | GAGGAGAGCGTGCACACAAA      | NM_028808 |
| <i>Rps29</i>                   | GTCTGATCCGCAAATACGGG     | AGCCTATGTCCATCGCGTACT     | NM_009093 |
| <i>Scd1</i>                    | CGTGGGCGCGGTGAT          | CAACACCATGGCGTTCCA        | NM_009127 |
| <i>αSMA</i>                    | GTCCCAGACATCAGGGAGTAA    | TCGGATACTTCAGCGTCAGGA     | NM_007392 |
| <i>Tnfa</i>                    | TGGGACAGTGACCTGGACTGT    | TTCGGAAGGCCATTTGAGT       | NM_013693 |
| <i>Tgfb1</i>                   | GAGCCCGAAGCGGACTACTA     | CACTGCTTCCGAATGTCTGA      | NM_011577 |

*Acc1*, Acetyl-CoA carboxylase 1; *Acs11*, Acyl-CoA synthetase long chain family member 1; *Adgre1* (*F4/80*), adhesion G protein-coupled receptor E1; *Col1a1*, collagen type I alpha 1; *Elovl6*, Elongation of long-chain fatty acids family member 6; *Fabp1*, Fatty acid-binding protein 1; *Fasn*, Fatty acid synthase; *Fat*, Fatty acid transporter; *Fatp1*, Long-chain fatty acid transport protein 1; *Mcp1*, monocyte chemoattractant protein-1; *Rps29*, Ribosomal protein S29; *Scd1*, Stearoyl-CoA desaturase-1; *αSMA*, alpha-smooth muscle actin; *Tnfa*, Tumor necrosis factor alpha; *Tgfb1*, transforming growth factor beta 1.

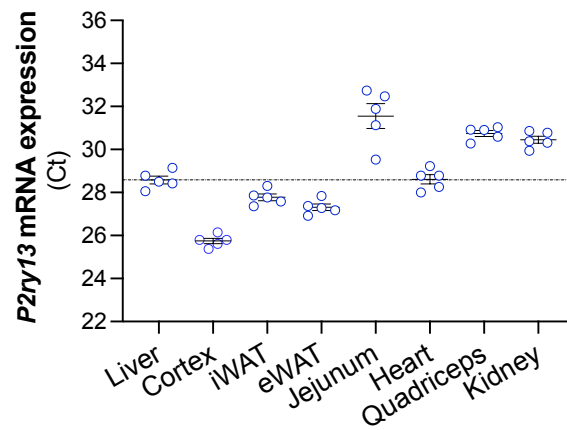

**Supplemental Figure 1. Ct values for *P2ry13* gene expression in mouse tissue**

All results were obtained from 24-month-old mice fed a chow diet (n = 5 mice).

Ct, cycle threshold, eWAT, epididymal white adipose tissue; iWAT, inguinal white adipose tissue

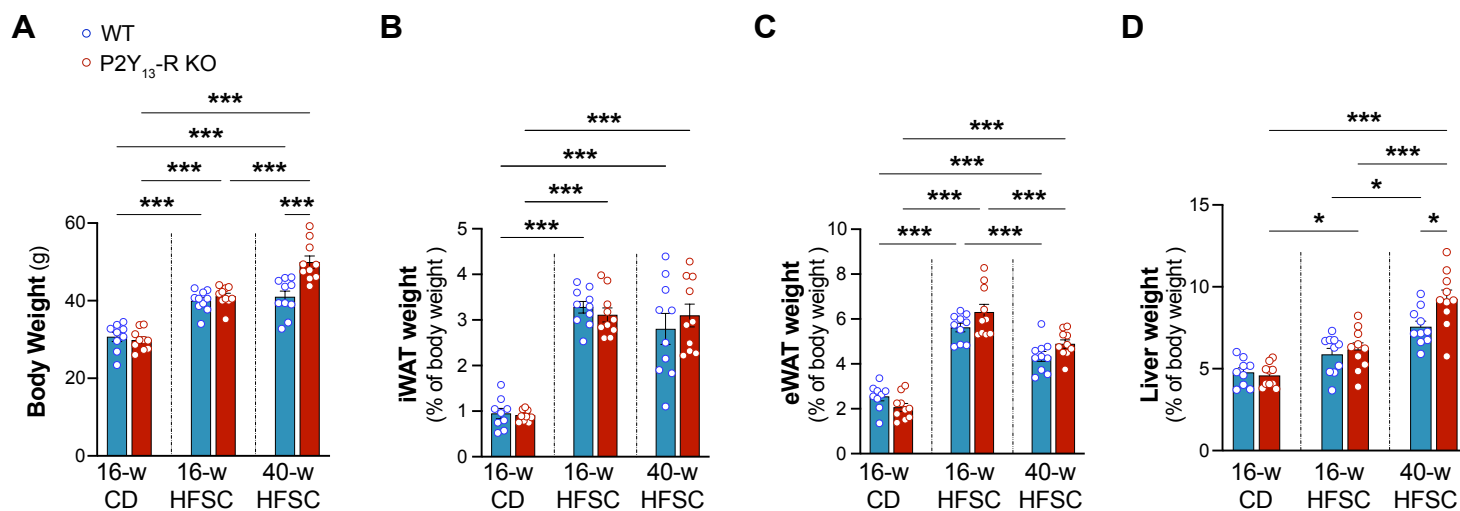

**Supplemental Figure 2. Body weight and tissue mass changes throughout experiments.**

**(A)** Body weight (n = 9 or 10 mice per group).

**(B)** iWAT weight (n = 9 or 10 mice per group)

**(C)** eWAT weight (n = 9 or 10 mice per group)

**(D)** liver weight (n = 9 or 10 mice per group).

Open blue and red circles represent WT and P2Y<sub>13</sub>-R KO mice, respectively.

All data are expressed as mean ± SEM.

\*P<0.05, \*\*\*P<0.001 (**A-D**, 1-way ANOVA followed by Holm-Sidak post hoc test was used for group comparison).

Results were obtained from mice fed a chow diet for 16-weeks (16-w), or HFSC diet for 16- or 40-weeks (40-w).

CD, chow-diet; eWAT, epididymal white adipose tissue; HFSC, high-fat high-sucrose high-cholesterol;

iWAT, inguinal white adipose tissue.

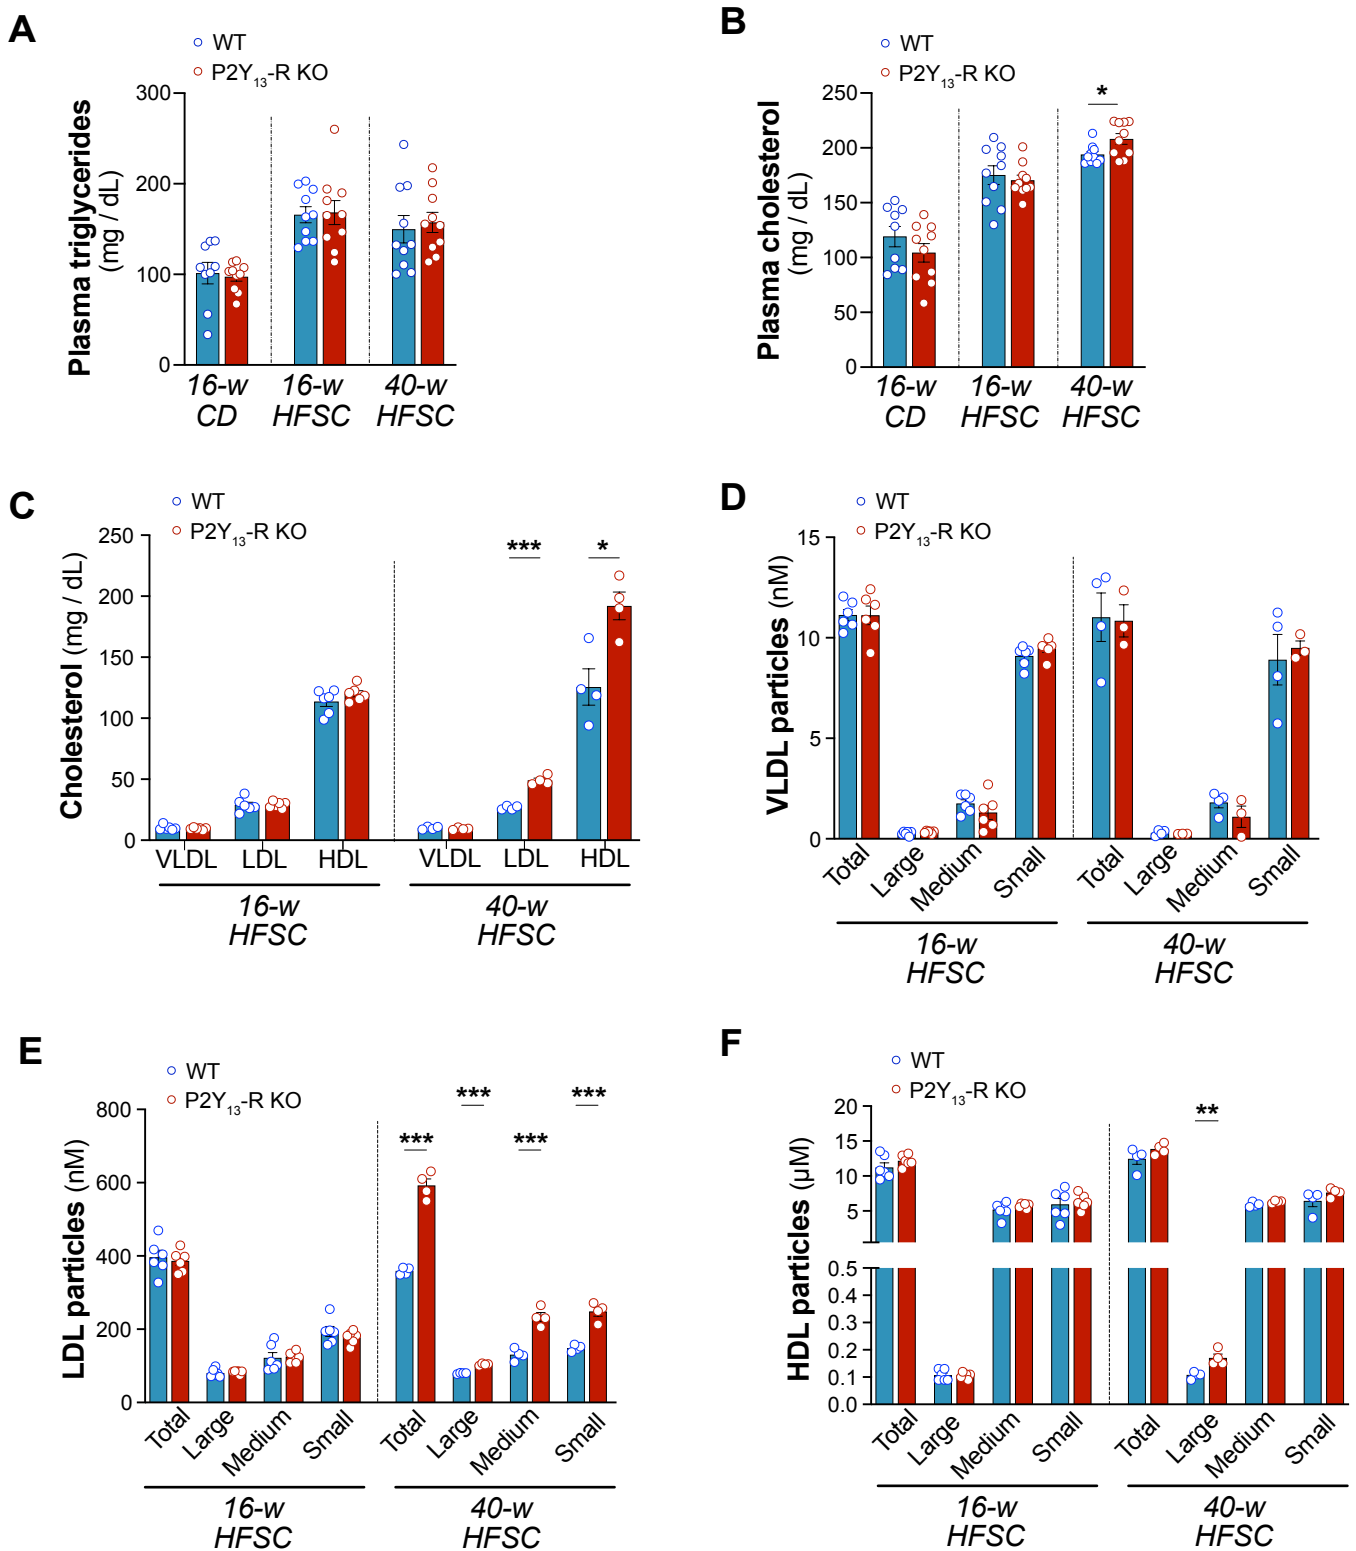

### Supplemental Figure 3. Plasma lipids levels throughout experiments.

(A) Plasma concentrations of triglycerides (n = 9 or 10 mice per group).

(B) Plasma concentrations of total cholesterol (n = 9 or 10 mice per group).

(C) Plasma concentrations of cholesterol content in lipoprotein classes (n = 4 to 6 mice per group).

(D) Plasma concentrations of VLDL particles (n = 4 to 6 mice per group).

(E) Plasma concentrations of LDL particles (n = 4 to 6 mice per group).

(F) Plasma concentrations of HDL particle (n = 4 to 6 mice per group).

Open blue and red circles represent WT and P2Y<sub>13</sub>-R KO mice, respectively.

All data are expressed as mean ± SEM.

\*P<0.05, \*\*P<0.01, \*\*\*P<0.001. (A-F, 2-tailed unpaired Student's t test was used for genotype comparison).

Results were obtained from mice fed chow diet for 16-weeks (16-w), or HFSC diet for 16- or 40-weeks (40-w).

CD, chow diet; HDL, high-density lipoprotein; HFSC, high-fat high-sucrose high-cholesterol; KO, knock-out;

LDL, low-density lipoprotein; VLDL, very low-density lipoprotein; WT, wild-type.

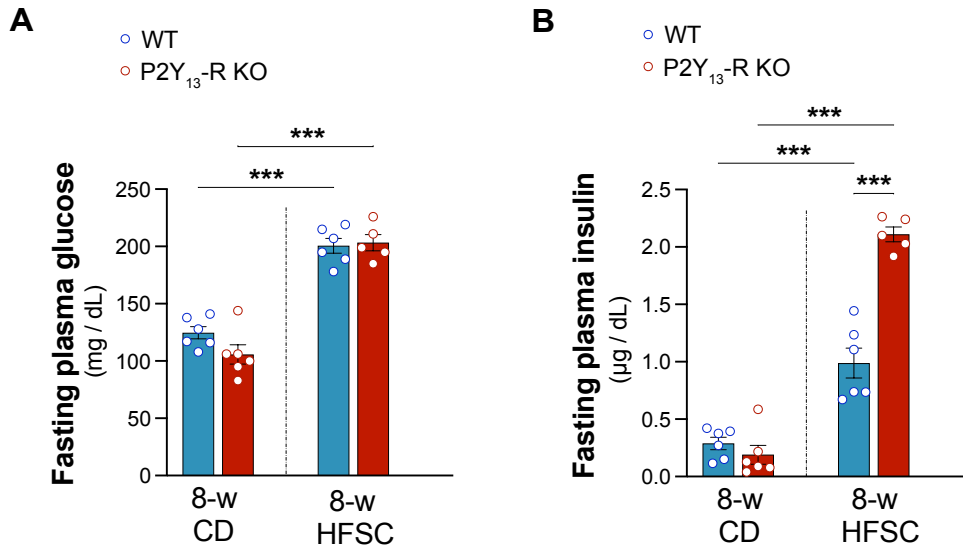

**Supplemental Figure 4. HFSC feeding efficiently impairs glucose metabolism.**

**(A)** Plasma levels of fasting glucose (n = 5 or 6 mice per group).

**(B)** Plasma level of fasting insulin (n = 5 or 6 mice per group).

Open blue and red circles represent WT and P2Y<sub>13</sub>-R KO mice, respectively.

All data are expressed as mean ± SEM.

\*\*\*P<0.001 (**A** and **B**, 1-way ANOVA followed by Holm-Sidak post hoc test was used for group comparison).

Results were obtained from mice fed CD or HFSC diet for 8-weeks (8-w)

CD, chow diet; HFSC, high-fat high-sucrose high-cholesterol.

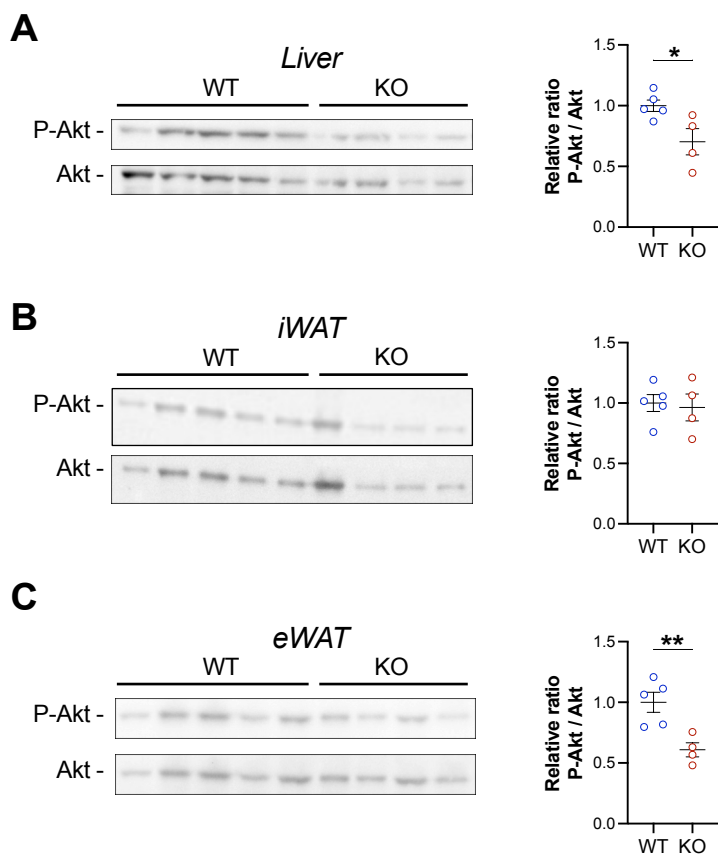

**Supplemental Figure 5. Lack of P2Y<sub>13</sub>-R decreases liver and white adipose tissue insulin sensitivity.**

Western blot analysis and quantification of immunoblotting data of insulin sensitivity through Akt signaling in **(A)** liver (n = 4 or 5 mice per group), **(B)** iWAT (n = 4 or 5 mice per group), and **(C)** eWAT (n = 4 or 5 mice per group).

Open blue circles represent WT mice and open red circles represent P2Y<sub>13</sub>-R KO mice.

All data are expressed as mean ± SEM.

\*P<0.05, \*\*P<0.01 (**A-F**, 2-tailed unpaired Student's t test was used for genotype comparison).

Results were obtained from mice fed HFSC diet for 10-weeks and received insulin at a dose of 1 mU / g of body weight into the portal vein.

eWAT, epididymal white adipose tissue; HFSC, high-fat high-sucrose high-cholesterol; iWAT, inguinal white adipose tissue; KO, knock-out; WT, wild-type.

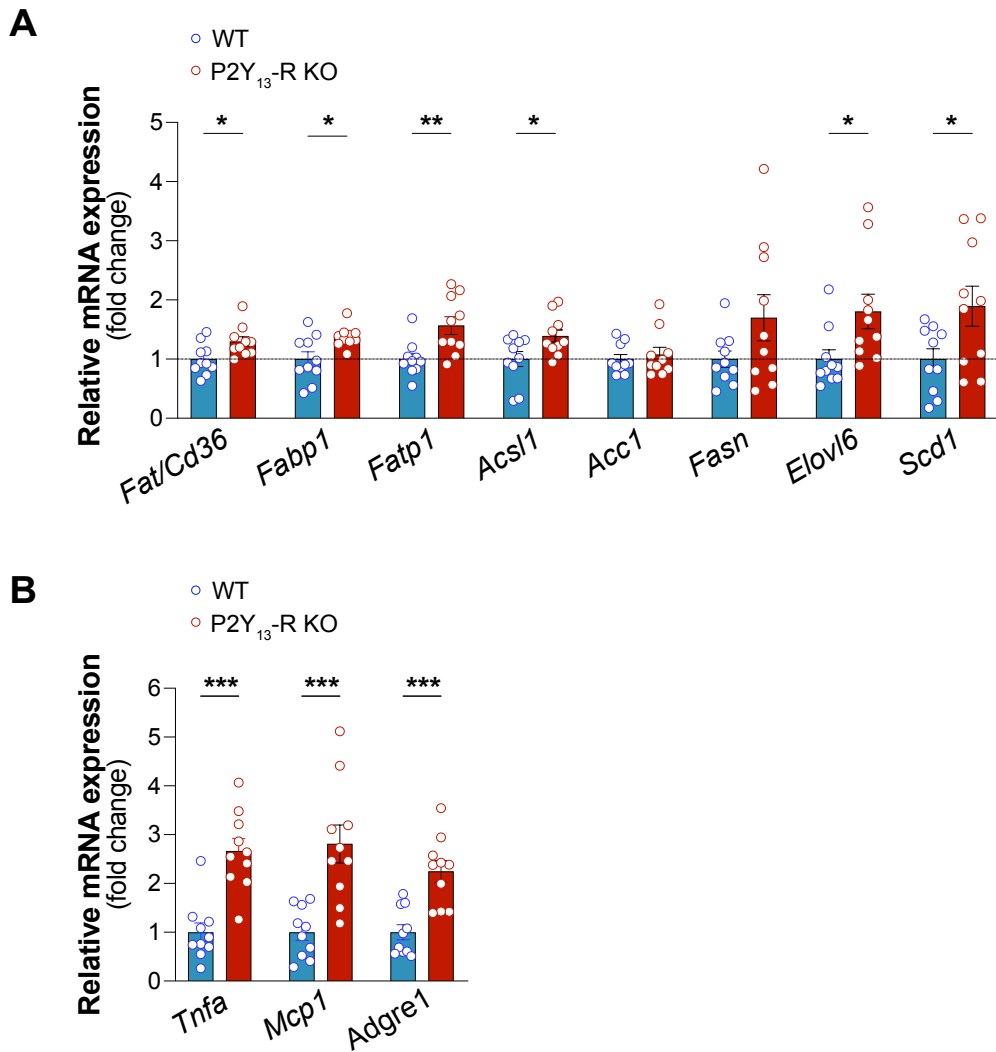

**Supplemental Figure 6. Lack of P2Y<sub>13</sub>-R increases hepatic expression of genes related to fatty acids handling, de-novo lipogenesis and inflammation. (A)** Relative mRNA expression level of genes involved in fatty acids handling and de-novo lipogenesis in liver from WT and P2Y<sub>13</sub>-R KO mice. **(B)** Relative mRNA expression level of genes related to inflammation in liver from WT and P2Y<sub>13</sub>-R KO mice.

mRNA expression data were normalized relative to the expression of *Rps29*.

Open blue circles represent WT mice and open red circles represent P2Y<sub>13</sub>-R KO mice (n = 10 mice per group).

All data are expressed as mean ± SEM. \*P<0.05, \*\*P<0.01 (2-tailed unpaired Student's t test was used for genotype comparison). All results were obtained from mice fed HFSC diet for 16-weeks.

*Acc1*, Acetyl-CoA carboxylase 1; *Acs1*, Acyl-coA synthetase long chain family member 1;

*Adgre1* (*F4/80*), adhesion G protein-coupled receptor E1; *Elovl6*, Elongation of long-chain fatty acids family member 6;

*Fabp1*, Fatty acid-binding protein 1; *Fasn*, Fatty acid synthase; *Fat/Cd36*, Fatty acid transporter;

*Fatp1*, Long-chain fatty acid transport protein-1; *Mcp1*, monocyte chemoattractant protein-1; *Rps29*, ribosomal protein S29;

*Scd1*, Stearoyl-CoA desaturase-1; *Tnfa*, Tumor necrosis factor alpha.

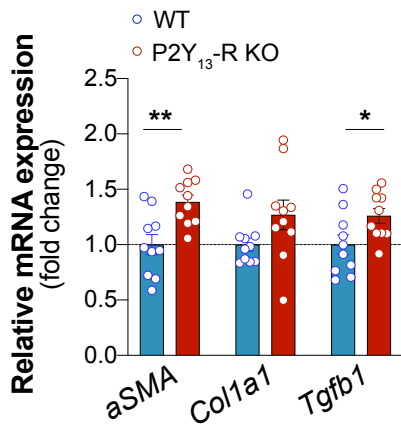

### Supplemental Figure 7. Liver expression of genes involved in fibrosis.

Relative mRNA expression levels of fibrotic genes in liver from WT and P2Y<sub>13</sub>-R KO mice.

mRNA expression data were normalized relative to the expression of *Rps29*.

Open blue circles represent WT mice and open red circles represent P2Y<sub>13</sub>-R KO mice (n = 10 mice per group).

All data are expressed as mean ± SEM.

All results were obtained from mice fed HFSC diet for 40-weeks.

\*P<0.05, \*\*P<0.01 (2-tailed unpaired Student's t test was used for genotype comparison).

*aSMA*, alpha-smooth muscle actin; *Col1a1*, collagen type I alpha 1; *Rps29*, ribosomal protein S29

*Tgfb1*, transforming growth factor beta 1.

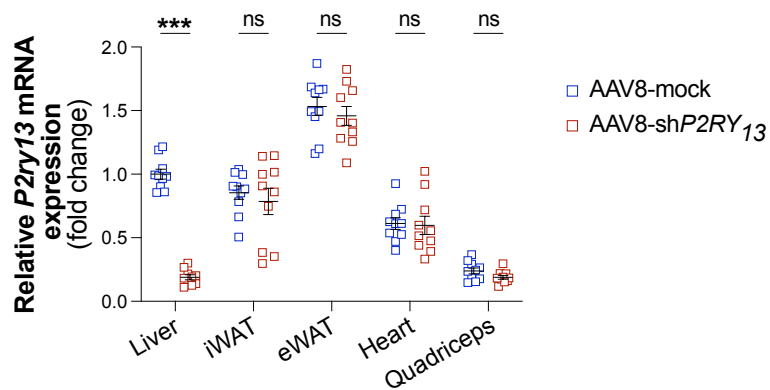

### Supplemental Figure 8. *P2Y*<sub>13</sub>-R expression in liver-specific *P2Y*<sub>13</sub>-R KD mice.

The relative mRNA expression level of *p2ry13* was examined in tissues of mice transduced with AAV8 carrying either mock (AAV8-mock, represented by open blue square, n = 10) or shRNA targeted against *P2Y*<sub>13</sub>-R (AAV8-sh*P2ry13*, represented by open red square, n = 10). mRNA expression data were normalized relative to the expression of *Rps29*.

All data are expressed as mean ± SEM.

\*\*\*P<0.001 (2-tailed unpaired Student's t test was used for group comparison).

Results were obtained from mice fed a HFSC diet for 16-weeks.

AAV8, adeno-associated virus serotype 8; eWAT, epididymal white adipose tissue;

HFSC, high-fat high-sucrose high-cholesterol; iWAT, inguinal white adipose tissue;

KD, knock-down; ns, non-significant.

**A**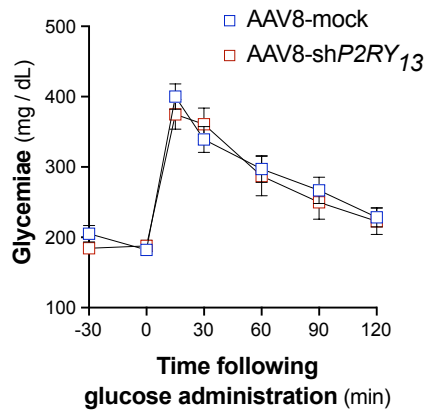**B**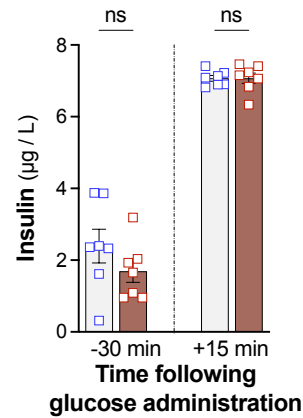

**Supplemental Figure 9. Glucose metabolism in liver specific P2Y<sub>13</sub>-R KD mice fed a HFSC diet.**

**(A)** OGTT (3 g/kg glucose) (n = 9 or 10 mice per group)

**(B)** OGTT-associated basal and glucose-stimulated insulinemia values in overnight-fasted (n = 7 mice per group)

Open blue squares represent control mice, transduced with AAV8-mock, and

open red squares represent P2Y<sub>13</sub>-R KD mice, transduced with AAV8-shP2RY<sub>13</sub>.

All data are expressed as mean ± SEM (**A**, 2-way ANOVA followed by Bonferroni's post hoc test was used for group comparison; **B**, 2-tailed unpaired Student's t test was used for group comparison).

All results were obtained from mice fed a HFSC diet for 8-weeks.

AAV8, adeno-associated virus serotype 8; HFSC, high-fat high-sucrose high-cholesterol; KD, knock-down;

ns, non-significant; OGTT, oral oral glucose tolerance test.

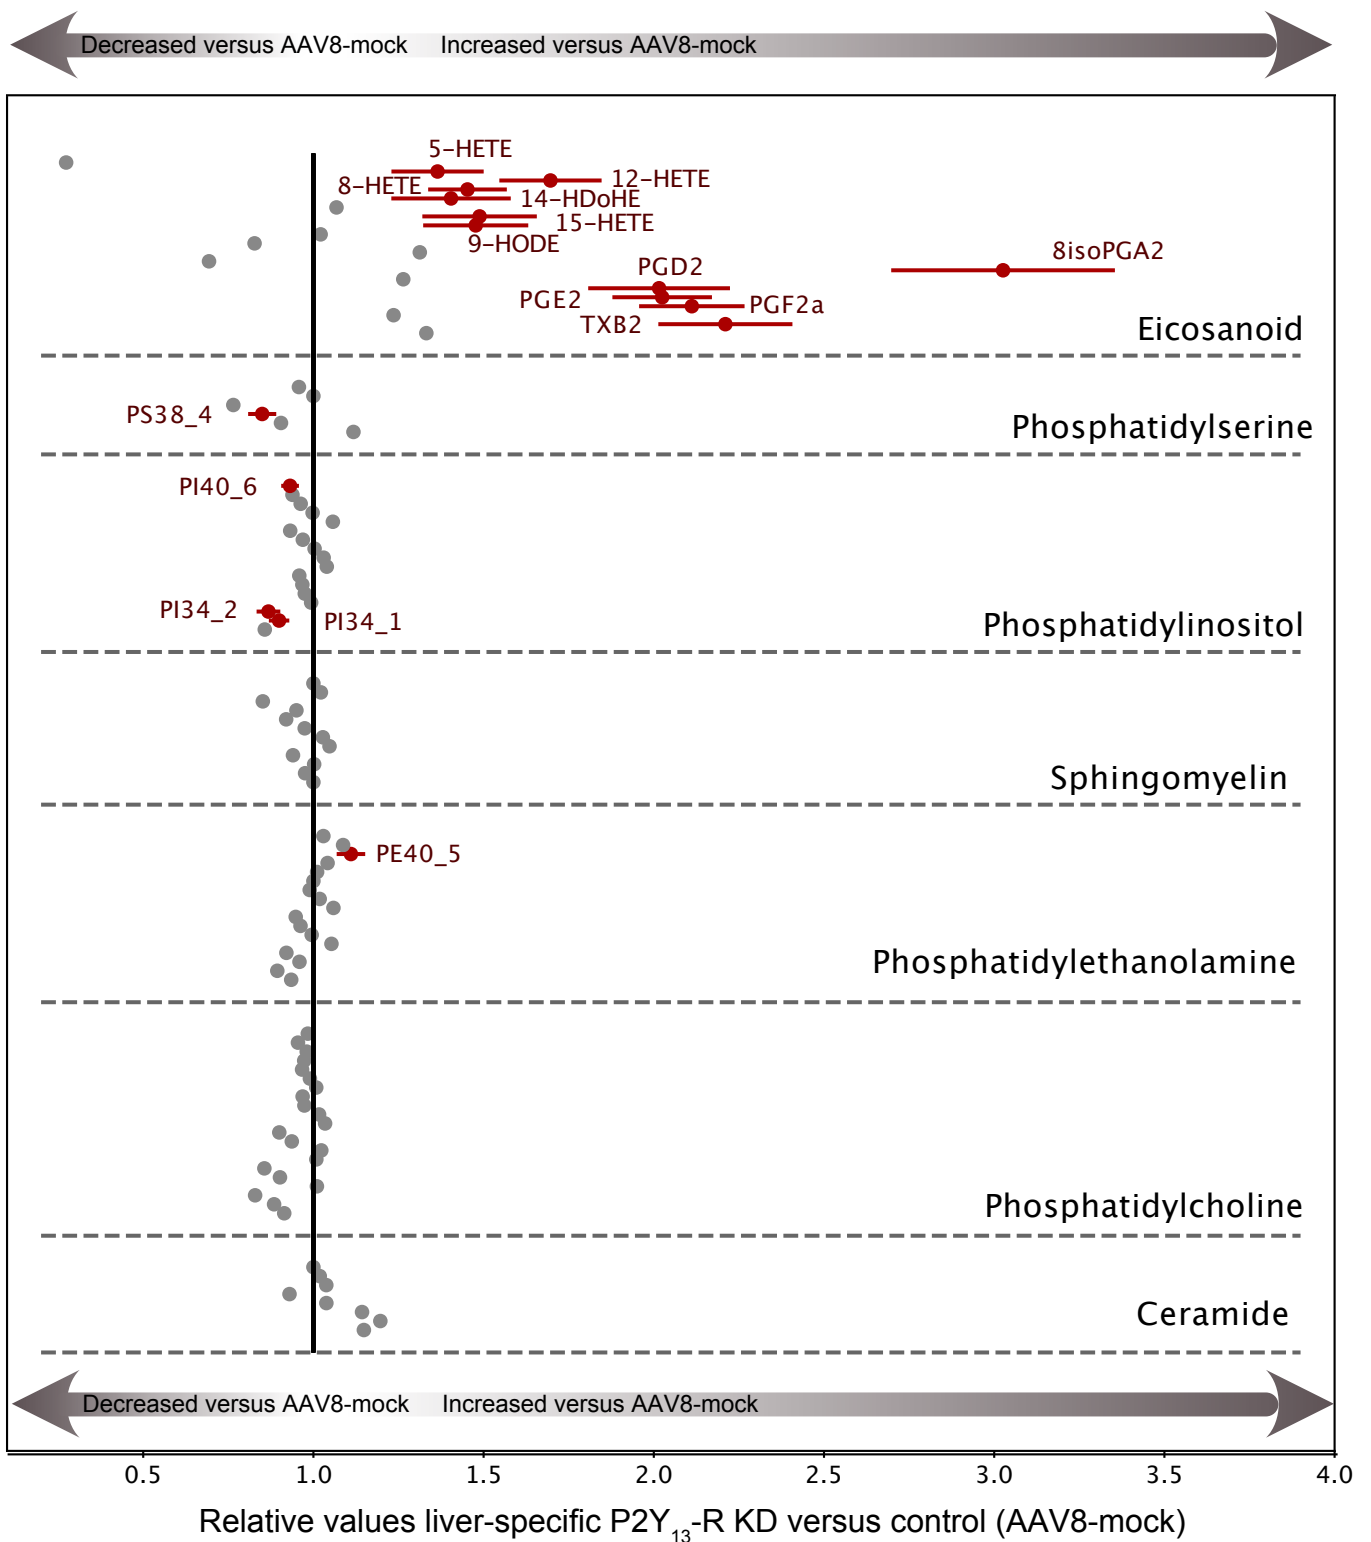

### Supplemental Figure 10. Liver lipidome analysis in liver-specific P2Y<sub>13</sub>-R KD fed HFSC for 16-weeks

A comparative liver lipidome analysis between P2Y<sub>13</sub>-R KD (AAV8-shP2RY<sub>13</sub>) and control (AAV8-mock) mice was conducted regarding phospholipids and eicosanoids after 16 weeks of HFSC diet feeding.

Data are presented as the mean of the P2Y<sub>13</sub>-R KD relative values to control ± SEM.

Results were obtained from 10 mice per groups.

Significant lipid changes (p<0.05) are identified and highlighted in red.

HFSC, high-fat high-sucrose high-cholesterol; KD, knock-down.
